# Supplementary material for: Predicting the defensive performance of individual players in one vs. one soccer games
Source: PLoS One. 2018 Dec 31;13(12):e0209822. doi: 10.1371/journal.pone.0209822 (PMC6312280; doi:10.1371/journal.pone.0209822)
Supplement: S6 Table — (DOCX) [file pone.0209822.s007.docx]

**S6 Table. Summary results from the linear mixed effects model, testing the effects of relative dribbling ability (PCD1), relative sprinting speed (PCS1) and relative coach ranking on the defender’s success in each paired bout in the one vs. one competition.**

| Path (radians.m-1) | Estimate | Std. Error | Tvalue | Pr(>|z|) |
| --- | --- | --- | --- | --- |
| Intercept | 2.944 | 0.128 | 23. 064 | 4.09e-14*** |
| PCD1 | 0.204 | 0.049 | 4.191 | 5.95e-05*** |
| PCS1 | -0.0003 | 0.053 | -0.007 | 0.995 |
| Coach ranking | 0.016 | 0.013 | 1.290 | 0.200 |
